# Supplementary material for: Hollow Fiber Membranes of PCL and PCL/Graphene as Scaffolds with Potential to Develop In Vitro Blood—Brain Barrier Models
Source: MDPI journal article supplement (doi:10.3390/membranes10080161), 2020-07-22
Supplement: s1 [file s1]

## Supplementary Materials

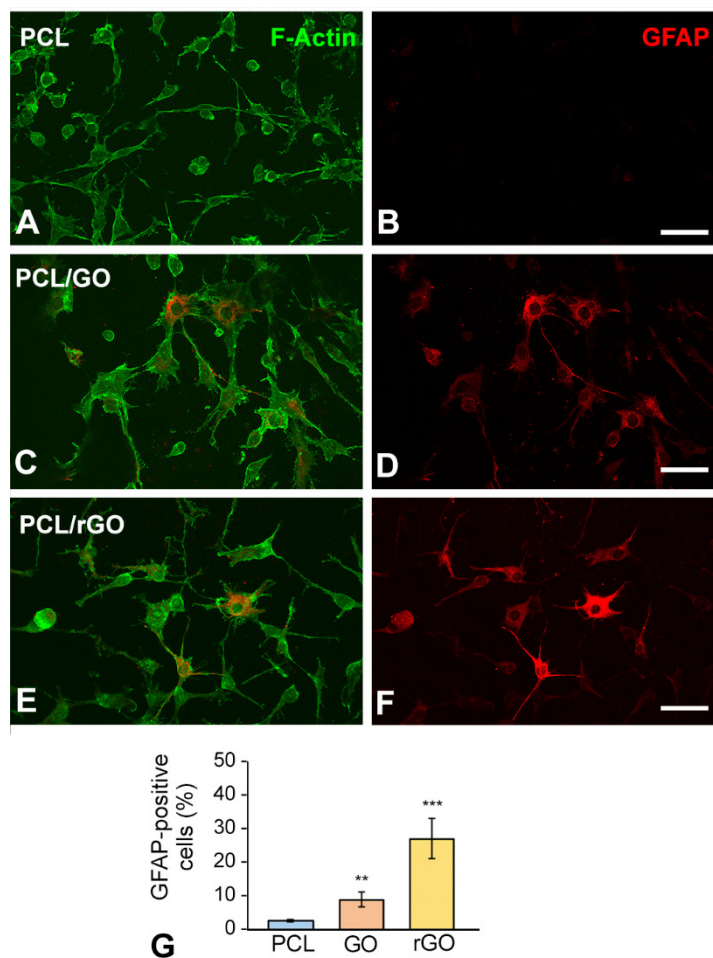

**Figure S1.** Representative images of confocal microscopy for the study of astrocyte differentiation for 72 hours of C6 cells grown on flat PCL membranes functionalized with either 0% graphene (A-B), 0.1wt% of GO (C-D) or 0.1 wt% of reduced GO (rGO) (E-F). Immunolabeling of GFAP (red channel) reveals astrocyte-differentiated cells, while F-Actin (green channel) counterstained all the cells in the field. (G) Quantification of percentage of GFAP-positive cells. Bars represent the mean  $\pm$  SD. Student's t test statistical analysis of significance ( $n \geq 4$ ) were carried out considering \*\*  $p < 0.005$ , \*\*\*  $p < 0.0005$ . Scale bar: 100  $\mu\text{m}$ .

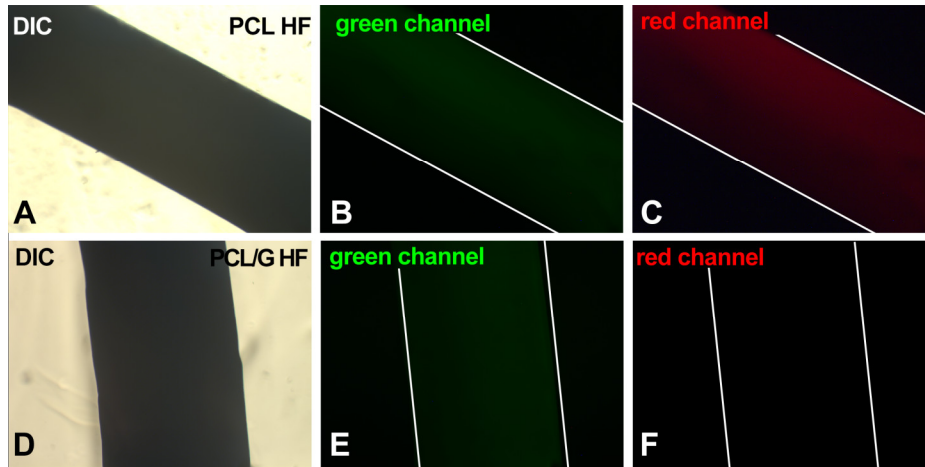

**Figure S2.** Representative fluorescence images of PCL HF and PCL/G HF. DIC images were taken as positional reference of the HF. Green and red channels images were acquired using acquisition times 100-1000X higher (4000msec) than regular epifluorescence images of stained cells cultured on HF.
